# Supplementary material for: Effects of Sarcosine (N-Methylglycine) on NMDA Receptor Hypofunction Induced by MK801: <em>In Vivo</em> Calcium Imaging in the CA1 Region of the Dorsal Hippocampus
Source: Preprints.org preprint supplement (doi:10.20944/preprints202410.2148.v1), 2024-10-28

A. Control session Mouse #1

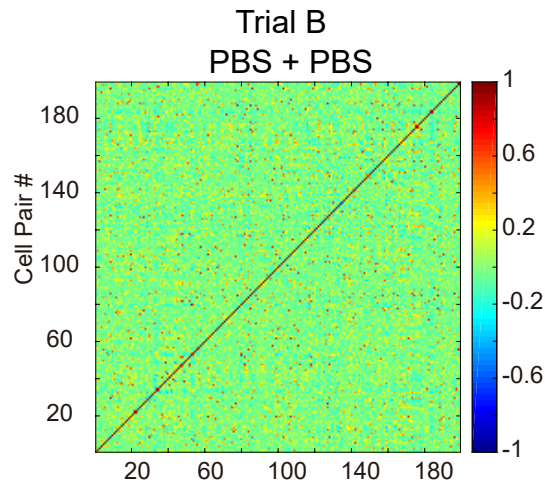

B. MK-801 session Mouse #1

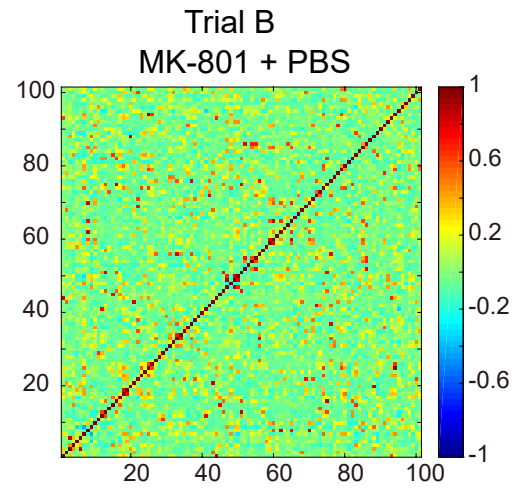

C. Drug test session Mouse #1

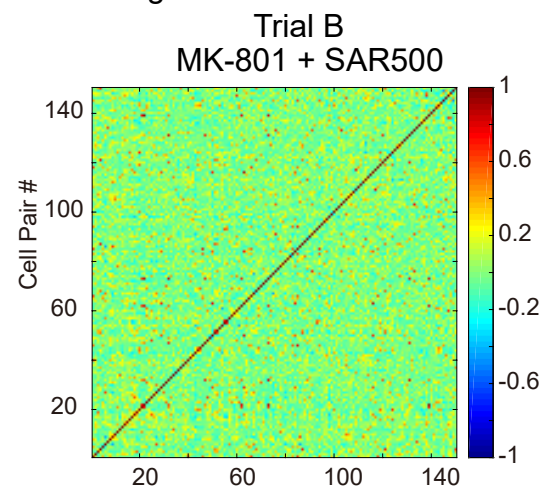

D. Drug test session Mouse #1

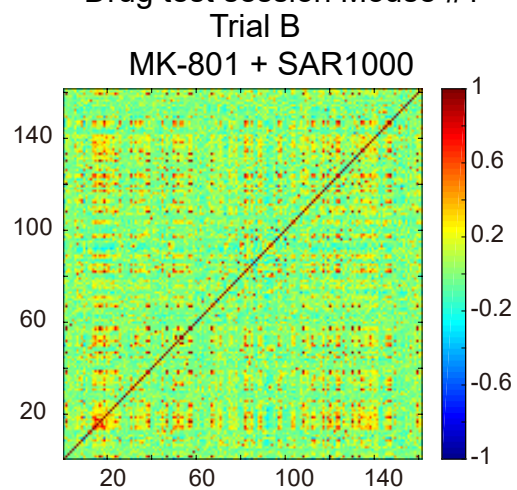

E. Control session Mouse #2

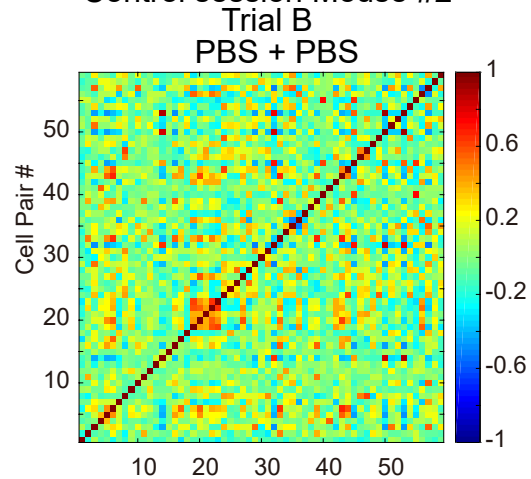

F. MK-801 session Mouse #2

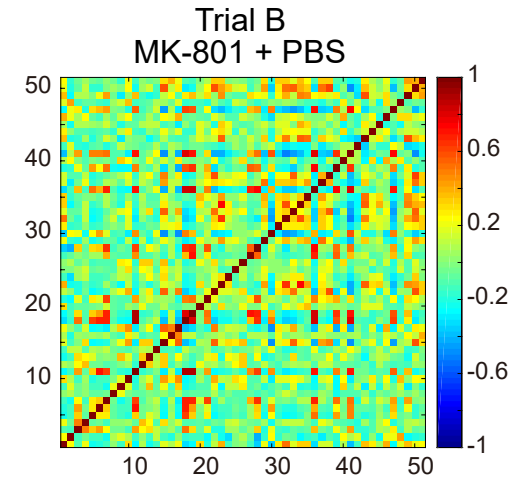

G. Drug test session Mouse #2

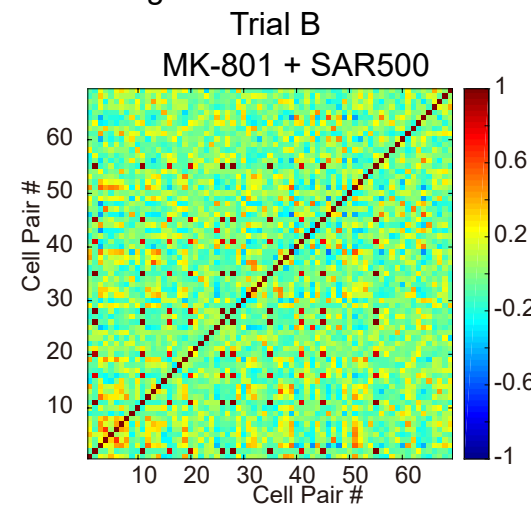

H. Drug test session Mouse #2

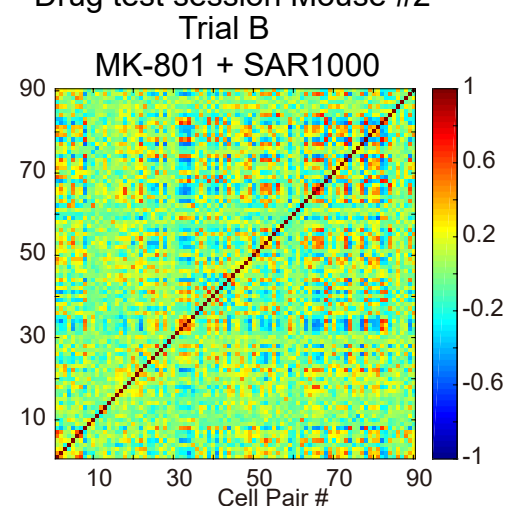

Supplement: Supplementary file 1 [file supplementary]
