# Supplementary figures and images for: Effects of Sarcosine (N-Methylglycine) on NMDA Receptor Hypofunction Induced by MK801: <em>In Vivo</em> Calcium Imaging in the CA1 Region of the Dorsal Hippocampus
Source: Preprints.org preprint supplement (doi:10.20944/preprints202410.2148.v1), 2024-10-28

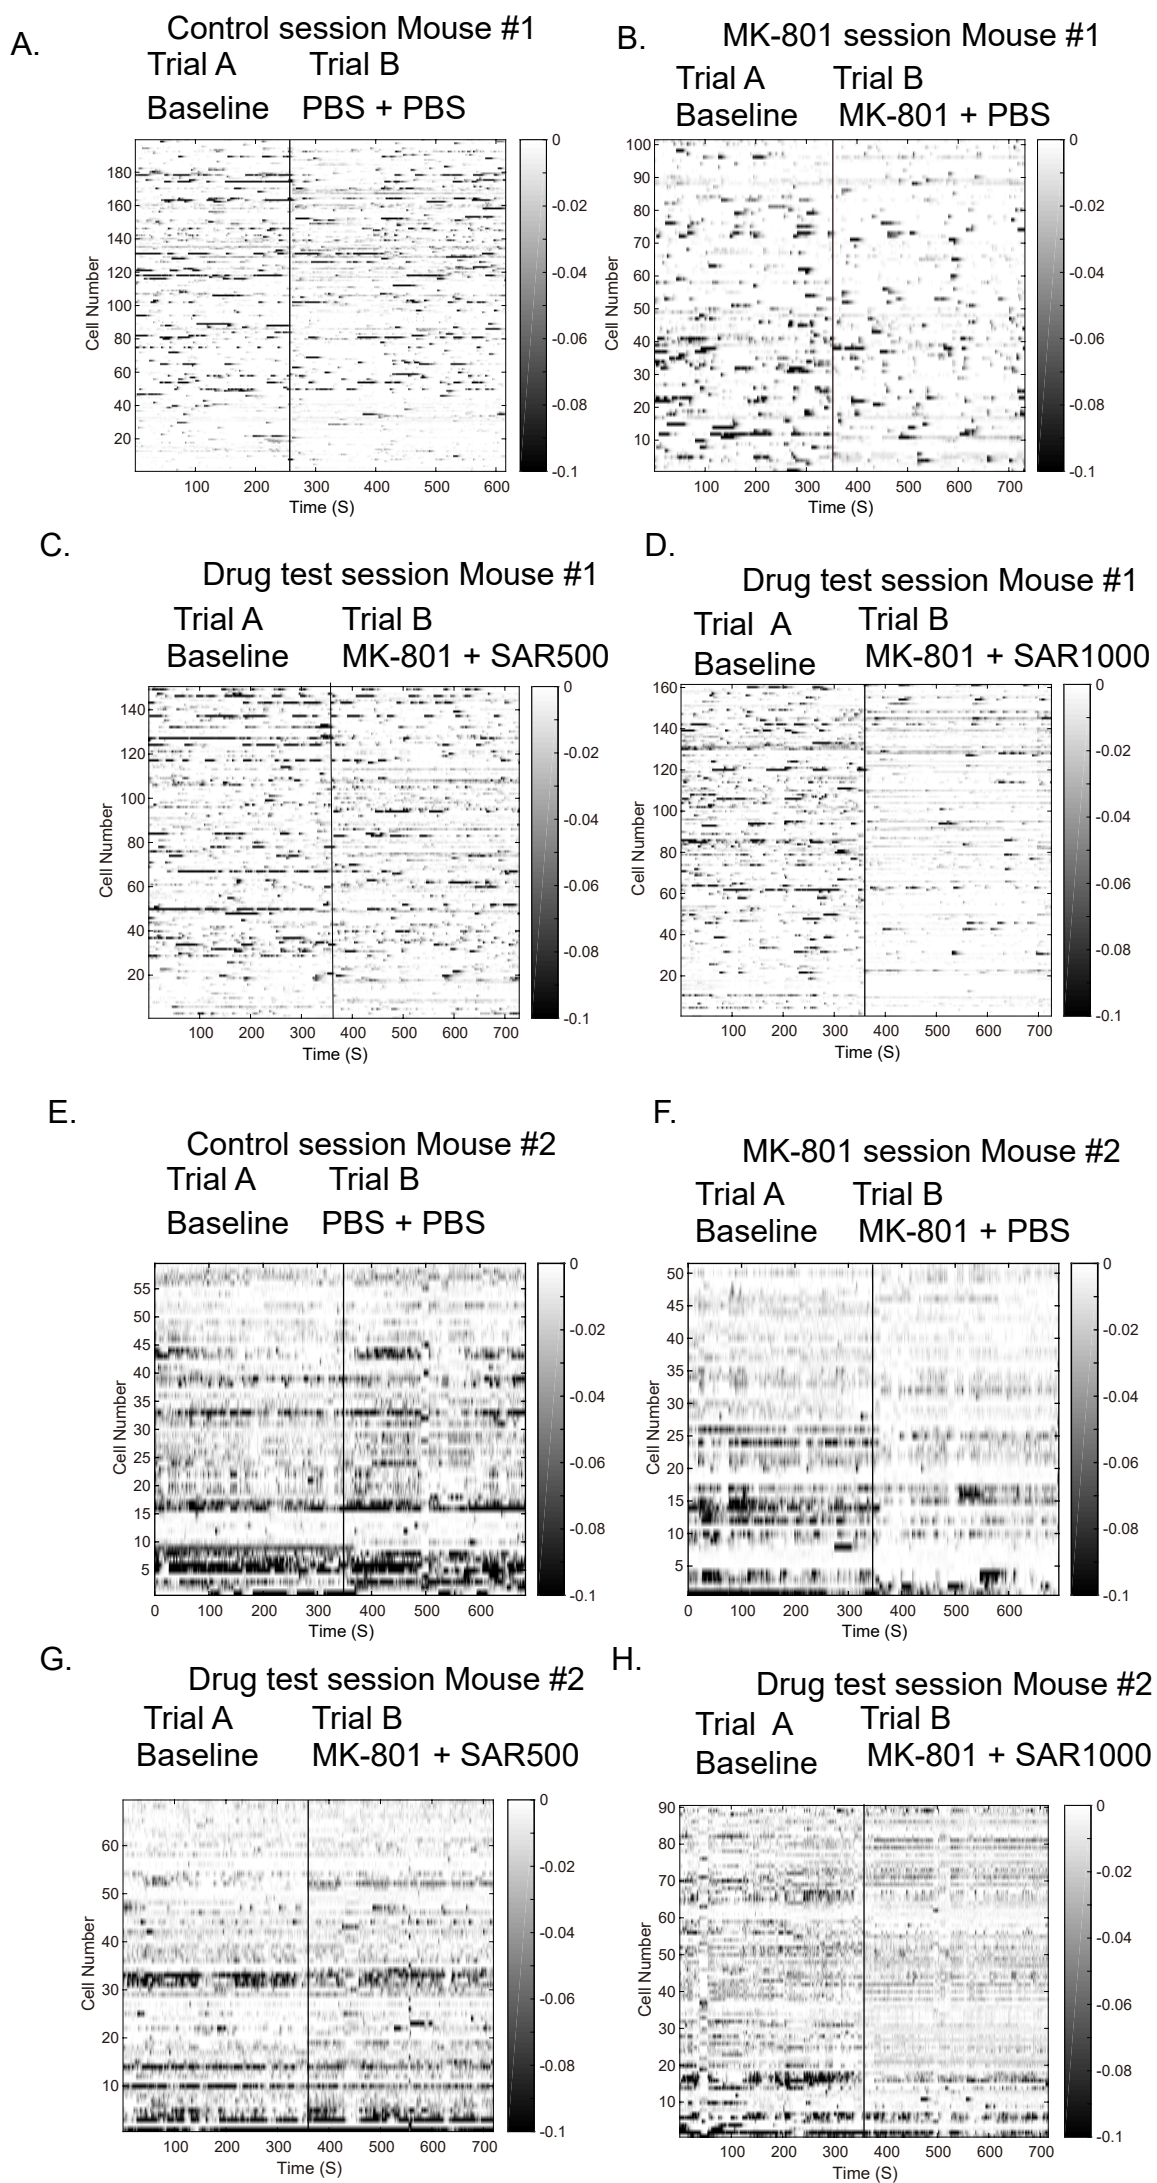

Supplement: Supplementary file 2 [file supplementary]
